# Supplementary material for: Synovial Fluid Interleukin-16 Contributes to Osteoclast Activation and Bone Loss through the JNK/NFATc1 Signaling Cascade in Patients with Periprosthetic Joint Infection
Source: MDPI journal article supplement (doi:10.3390/ijms21082904), 2020-04-21
Supplement: s1 [file s1]

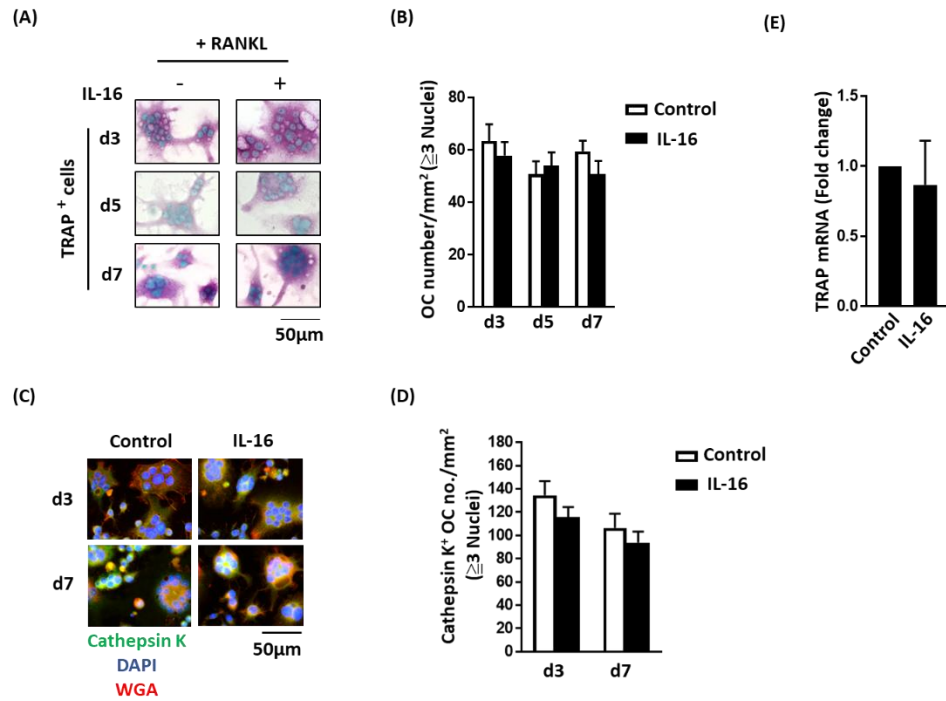

**Figure S1.** Interleukin-16 (IL-16) did not change the receptor activator of nuclear factor-kappa B ligand (RANKL)-induced differentiation of RAW264.7 cells into osteoclast-like cells. **(A, B)** IL-16 did not change RANKL-induced differentiation of RAW264.7 cells into tartrate-resistant acid phosphatase (TRAP)-positive osteoclast-like cells. **(C, D)** IL-16 did not change RANKL-induced differentiation of RAW264.7 cells into cathepsin K-positive osteoclast-like cells. **(E)** IL-16 did not enhance the RANKL-induced mRNA expression level of TRAP.

(A)

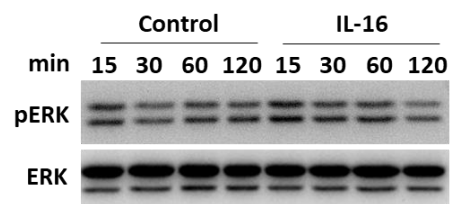

(B)

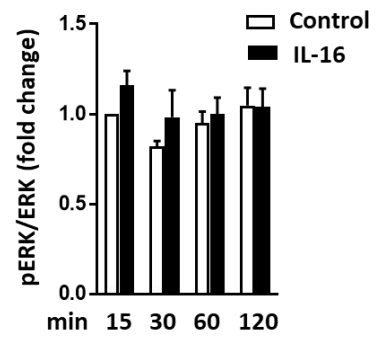

(A, B) IL-16 did not activate ERK MAPK signaling.
